# Supplementary material for: In Vivo Effects of Free Form Astaxanthin Powder on Anti-Oxidation and Lipid Metabolism with High-Cholesterol Diet
Source: PubMed Central journal article supplement (PMC4532504; doi:10.1371/journal.pone.0134733), 2015-08-11

**S1 Fig. Astaxanthin powder and different diets used in this study**

(A) *Free form Astaxanthin powder (FFAP) used in this study and its chemical formula.*

The free form astaxanthin powder contains 1% pure ASTA.

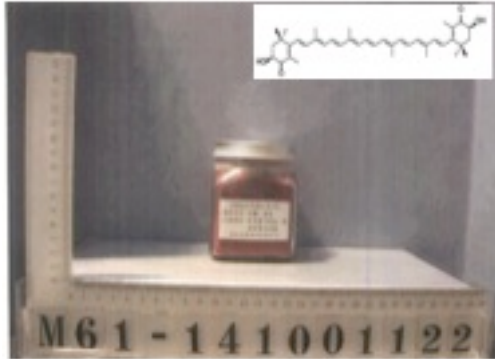

(B) *Images of 5 different formula diets used in this study. From left to right: normal diet; high cholesterol control (normal diet+0.2 % cholesterol); 1.6% FFAP (high cholesterol control+1.6 %FFAP); 3.2% FFAP (high cholesterol control+3.2 % FFAP); 8.0% FFAP (high cholesterol control+8.0 %FFAP).*

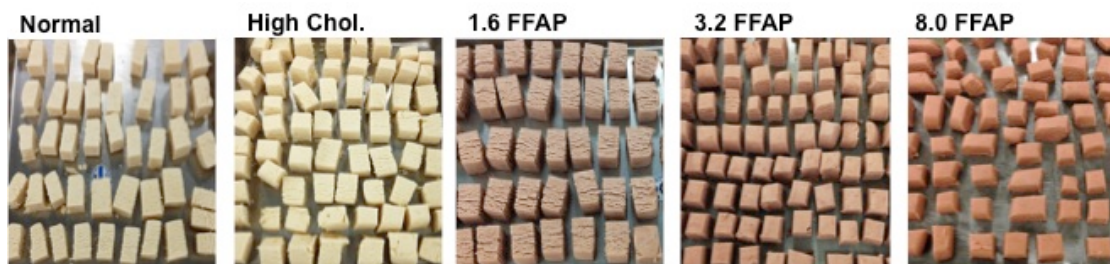

Supplement: pone.0134733.s001.pdf [file pone.0134733.s001.pdf]
