# Supplementary material for: In Vivo Effects of Free Form Astaxanthin Powder on Anti-Oxidation and Lipid Metabolism with High-Cholesterol Diet
Source: PubMed Central journal article supplement (PMC4532504; doi:10.1371/journal.pone.0134733), 2015-08-11
Supplement: pone.0134733.s004.pdf [file pone.0134733.s004.pdf]

**S1 Table. Astaxanthin total intake and output of all diet groups.**

| <b>Group</b>    | <b>Astaxanthin Intake (mg/day)</b> | <b>Astaxanthin Output (mg/day)</b> | <b>Astaxanthin Total absorption (mg/day)</b> |
|-----------------|------------------------------------|------------------------------------|----------------------------------------------|
| <b>Normal</b>   | ND                                 | ND                                 | ND                                           |
| <b>Control</b>  | ND                                 | ND                                 | ND                                           |
| <b>1.6 FFAP</b> | 1.44 ± 0.17 <sup>b</sup>           | 0.30 ± 0.01 <sup>b</sup>           | 1.14 ± 0.16 <sup>b</sup>                     |
| <b>3.2 FFAP</b> | 2.78 ± 0.16 <sup>a</sup>           | 0.37 ± 0.14 <sup>ab</sup>          | 2.41 ± 0.30 <sup>a</sup>                     |
| <b>8.0 FFAP</b> | 3.67 ± 0.73 <sup>a</sup>           | 0.51 ± 0.04 <sup>a</sup>           | 3.16 ± 0.77 <sup>a</sup>                     |

*Normal: Normal diet; Control: Normal diet + 0.2 % cholesterol; 1.6FFAP: control diet + 1.6 %FFAP; 3.2FFAP: control diet + 3.2 % FFAP; 8.0FFAP: control diet + 8.0 %FFAP. All values are mean ± SD (n = 9), and in the same column values not sharing a common superscription letters are significantly different from one another by Duncan's rang test ( p < 0.05 ). Total ASTA intake was calculated using the formula shown below: Total ASTA intake (g) = Food intake (g) x FFAP (%) x 1% (ASTA concentration in FFAP)*
